# Supplementary material
Source: PubMed Central journal article supplement (PMC3082949)
Supplement: NIHMS287233-supplement-Supplement1.pdf [file NIHMS287233-supplement-Supplement1.pdf]

## Supplementary Appendix

This appendix has been provided by the authors to give readers additional information about their work.

Supplement to: Mozaffarian D, Shi P, Morris JS, et al. Mercury exposure and risk of cardiovascular disease in two U.S. cohorts. *N Engl J Med* 2011;364:1116-25.

## **Mercury Exposure and Risk of Cardiovascular Disease in Two US Cohorts**

### **Supplementary Appendix**

Dariusz Mozaffarian, MD DrPH, Peilin Shi, PhD, J. Steven Morris, PhD, Donna Spiegelman, ScD, Philippe Grandjean, MD DMSc, David S. Siscovick, MD MPH, Walter C. Willett, MD DrPH, Eric B. Rimm, ScD

From the Division of Cardiovascular Medicine (DM) and Channing Laboratory (DM, WW, ER), Brigham and Women's Hospital and Harvard Medical School; and Departments of Epidemiology (DM, PS, DS, WW, ER), Nutrition (DM, WW, ER), Biostatistics (DS), and Environmental Health (PG), Harvard School of Public Health, Boston, MA; the Cardiovascular Health Research Unit, Departments of Medicine and Epidemiology (DSS), University of Washington, Seattle, WA; and the University of Missouri Research Reactor (SM), Columbia, MO.

Correspondence: D. Mozaffarian, 665 Huntington Ave Bldg 2-319, Boston, MA 02115, phone 617-432-2887; fax 617-432-2435; [dmozaffa@hsph.harvard.edu](mailto:dmozaffa@hsph.harvard.edu)

Support: These investigations were the primary aims of R01-ES014433 from the National Institute of Environmental Health Services, NIH, and were further supported by NIH research grants HL34594, HL088521, HL35464, CA87969, and CA55075. The funding sources had no role in study design; in the collection, analysis, or interpretation of data; in the writing of the report; or in the decision to submit the paper for publication.

## Table of Contents

|                                                     |                |
|-----------------------------------------------------|----------------|
| <b>Assessment of Mercury and Selenium Exposures</b> | <b>Page 3</b>  |
| <b>Stroke Subtypes</b>                              | <b>Page 4</b>  |
| <b>Power Calculations</b>                           | <b>Page 5</b>  |
| <b>Additional Sensitivity Analyses</b>              | <b>Page 5</b>  |
| <b>References</b>                                   | <b>Page 6</b>  |
| <b>Supplementary Table 1</b>                        | <b>Page 7</b>  |
| <b>Supplementary Table 2</b>                        | <b>Page 8</b>  |
| <b>Supplementary Table 3</b>                        | <b>Page 9</b>  |
| <b>Supplementary Table 4</b>                        | <b>Page 10</b> |
| <b>Supplementary Table 5</b>                        | <b>Page 11</b> |
| <b>Supplementary Table 6</b>                        | <b>Page 12</b> |

## **Assessment of Mercury and Selenium Exposures**

Total mercury and selenium concentrations were assessed in the stored toenails of cases and controls using neutron-activation analysis (University of Missouri Research Reactor). Validity, reproducibility, and reliability have been described.<sup>1-5</sup> Samples of nail clippings from all toes were combined which, due to the elimination half-life of methylmercury, the growth rate of toenails, and the differential length of time (distance) from cuticle synthesis to time of clipping across the smallest to largest toes, provides a time-integrated measure of exposure over approximately the prior year. Sample mass was adequate for neutron activation analysis in all participants. Matched case-control sets were handled identically and in the same analytical run, but in random order with case-control status unknown to the laboratory personnel. Selenium determinations were performed in 41 analytical batches between 2007 and 2008, and mercury determinations in 72 analytical batches between 2009 and 2010. Potential laboratory drift was controlled by both standard comparison procedures for neutron activation analysis and repeated analysis of representative sample subsets, as well as during analysis by use of matched-pair conditional logistic regression. Intra-assay coefficients of variation were 5.5% for mercury and 2.4% for selenium.

In prior analyses,<sup>1-5</sup> we have shown that toenail mercury and selenium concentrations are excellent biomarkers of usual methylmercury and selenium exposure. Consumption of tuna and other saltwater fish are primary dietary factors positively associated with toenail mercury.<sup>1-3</sup> Toenail selenium concentrations respond to long-term changes in dietary consumption and correlate with serum or whole blood selenium levels.<sup>4,5</sup> Toenail mercury concentrations at one time also predict future exposure, with Spearman correlation( $r$ )=0.56 ( $p<0.001$ ) for levels assessed in clippings obtained 6 years apart,<sup>2</sup> similar to correlations of 0.6 to 0.7 typically observed, over similar time intervals, for widely used epidemiologic measures such as blood pressure.<sup>6</sup> Variability of toenail selenium over time

is slightly higher but still reasonable ( $r=0.48$  for levels in clippings obtained 6 years apart).<sup>2</sup> In one study comparing several exposure biomarkers, mercury concentrations in toenails had stronger cross-sectional associations with some intermediate cardiovascular disease risk factors compared with blood or hair concentrations.<sup>7</sup>

For assessing population health effects, the primary mercury species of interest is methylmercury, derived principally from fish intake.<sup>8</sup> Absent unusual occupational/environmental exposures to mercury vapor, methylmercury is the principal determinant of variation in hair and toenail mercury concentrations. When hair mercury levels are speciated, total mercury and methylmercury levels correlate nearly perfectly:  $r=0.99$ .<sup>9</sup> Similarly, when we speciated toenail mercury levels<sup>10</sup> from a subset of nondentist controls (Quicksilver Scientific, LLC, Lafayette, CO), total mercury and methylmercury concentrations correlated nearly perfectly:  $r=0.97$ ,  $p<0.001$ .

### **Stroke Subtypes**

Stroke subtypes were also classified as previously described.<sup>11,12</sup> Ischemic stroke was defined as cerebral infarction caused by thrombi (thrombotic stroke) or extracranial emboli (embolic stroke). Subarachnoid hemorrhage was defined as hemorrhage in the subarachnoid space, usually caused by saccular cerebral artery aneurysm rupture, less commonly by arteriovenous malformations or other causes. Intraparenchymal hemorrhage was defined as hemorrhage in intraparenchymal regions not due to aneurysm or arteriovenous malformation. Mercury exposure was not associated with risk of any of the major stroke subtypes, including ischemic stroke (643 cases; extreme-quintile relative risk=0.79, 95%CI=0.53-1.18; P for trend=0.33), hemorrhagic stroke (139 cases; extreme-quintile relative risk=0.89, 95%CI=0.35-2.26; P for trend=0.50), or unknown stroke types (282 cases; extreme-quintile relative risk=0.96, 95%CI=0.49-1.89; P for trend=0.85).

## **Power Calculations**

Power calculations demonstrated over 80% power to detect extreme-quintile relative risks (i.e., for the comparison of the top to the bottom quintile) greater than 1.25 and over 90% power to detect extreme-quintile relative risks greater than 1.30. For the test for trend across quintiles, power calculations demonstrated over 80% power to detect extreme-quintile relative risks greater than 1.20 and over 90% power to detect extreme-quintile relative risks greater than 1.25.

## **Additional Sensitivity Analyses**

In sensitivity analyses to minimize potential misclassification due to exposure changes over time, mercury concentrations were not associated with higher cardiovascular disease risk when restricting the analysis to events occurring within 10 years of toenail sampling (extreme-quintile relative risk=0.86, 95%CI=0.66-1.13; P for trend=0.32) or stratified by duration of follow-up since toenail sampling (Supplementary Appendix Table 4). By end of follow-up, 76, 15, and 9 percent of individuals had increased or decreased their fish consumption by less than 1 quintile, 2 quintiles, or more than 2 quintiles compared to baseline. In analyses restricted to individuals without substantial changes ( $\leq 2$  quintiles) in fish consumption during follow-up, mercury concentrations were not associated with higher cardiovascular disease risk (extreme-quintile relative risk=0.83, 95%CI=0.66-0.99; P for trend=0.06). There was also little evidence for statistical interaction between fish intake and mercury levels (P for interaction=0.76 for coronary heart disease, 0.16 for stroke, and 0.55 for total cardiovascular disease). Findings were similar for risk of coronary heart disease and stroke evaluated separately (not shown).

## REFERENCES

1. Joshi A, Douglass CW, Kim HD, et al. The relationship between amalgam restorations and mercury levels in male dentists and nondental health professionals. *J Public Health Dent* 2003;63:52-60.
2. Garland M, Morris JS, Rosner BA, et al. Toenail trace element levels as biomarkers: reproducibility over a 6-year period. *Cancer Epidemiol Biomarkers Prev* 1993;2:493-7.
3. MacIntosh DL, Williams PL, Hunter DJ, et al. Evaluation of a food frequency questionnaire-food composition approach for estimating dietary intake of inorganic arsenic and methylmercury. *Cancer Epidemiol Biomarkers Prev* 1997;6:1043-50.
4. Longnecker MP, Stampfer MJ, Morris JS, et al. A 1-y trial of the effect of high-selenium bread on selenium concentrations in blood and toenails. *Am J Clin Nutr* 1993;57:408-13.
5. Longnecker MP, Stram DO, Taylor PR, et al. Use of selenium concentration in whole blood, serum, toenails, or urine as a surrogate measure of selenium intake. *Epidemiology* 1996;7:384-90.
6. Rosner B, Hennekens CH, Kass EH, Miall WE. Age-specific correlation analysis of longitudinal blood pressure data. *Am J Epidemiol* 1977;106:306-13.
7. Choi AL, Weihe P, Budtz-Jorgensen E, et al. Methylmercury exposure and adverse cardiovascular effects in Faroese whaling men. *Environ Health Perspect* 2009;117:367-72.
8. Mercury Study Report to Congress. 1997. (Accessed January 24, 2006, at <http://www.epa.gov/mercury/report.htm>.)
9. Berglund M, Lind B, Bjornberg KA, Palm B, Einarsson O, Vahter M. Inter-individual variations of human mercury exposure biomarkers: a cross-sectional assessment. *Environ Health* 2005;4:20.
10. Shade CW, Hudson RJ. Determination of MeHg in environmental sample matrices using Hg-thiourea complex ion chromatography with on-line cold vapor generation and atomic fluorescence spectrometric detection. *Environ Sci Technol* 2005;39:4974-82.
11. Iso H, Rexrode KM, Stampfer MJ, et al. Intake of fish and omega-3 fatty acids and risk of stroke in women. *JAMA* 2001;285:304-12.
12. Walker AE, Robins M, Weinfeld FD. The National Survey of Stroke. Clinical findings. *Stroke* 1981;12:113-44.

**Supplementary Table 1.** Baseline Characteristics According to Mercury Levels Among 3,427 Controls in Two Prospective US Cohorts of Men and Women.

| Quintiles                                 | Sex-Specific Quintiles of Toenail Mercury |      |      |      |      | P for Trend |
|-------------------------------------------|-------------------------------------------|------|------|------|------|-------------|
|                                           | Q1                                        | Q2   | Q3   | Q4   | Q5   |             |
| Mercury concentration ( $\mu\text{g/g}$ ) |                                           |      |      |      |      |             |
| Mean                                      | 0.09                                      | 0.17 | 0.25 | 0.38 | 0.95 | P for       |
| Median                                    | 0.09                                      | 0.17 | 0.25 | 0.36 | 0.68 | Trend       |
| Age, years                                | 56.4                                      | 56.3 | 56.4 | 56.6 | 56.2 | 0.84        |
| Sex, % female                             | 64.7                                      | 64.7 | 64.7 | 64.7 | 64.7 | 1.00        |
| Smoking status,                           |                                           |      |      |      |      |             |
| Never                                     | 42.8                                      | 40.7 | 36.2 | 34.6 | 35.3 | 0.21        |
| Past                                      | 25.6                                      | 31.0 | 35.5 | 35.0 | 37.1 |             |
| Current                                   | 31.4                                      | 28.2 | 27.4 | 30.0 | 27.2 |             |
| Family history of MI, %                   | 23.8                                      | 23.5 | 24.6 | 28.9 | 26.0 | 0.16        |
| Hypertension, %                           | 11.2                                      | 13.1 | 11.8 | 13.9 | 14.0 | 0.15        |
| Hypercholesterolemia, %                   | 3.4                                       | 6.7  | 7.1  | 7.0  | 10.7 | <0.001      |
| Diabetes mellitus, %                      | 1.3                                       | 2.0  | 1.6  | 1.3  | 1.5  | 0.75        |
| Body mass index, $\text{kg/m}^2$          | 25.2                                      | 25.1 | 25.0 | 24.7 | 24.6 | 0.001       |
| Physical activity, METS/week              | 7.7                                       | 8.8  | 8.3  | 8.8  | 10.4 | 0.01        |
| Alcohol, drink/week                       | 0.4                                       | 0.5  | 0.7  | 0.8  | 0.9  | <0.001      |
| Toenail selenium, $\mu\text{g/g}$         | 0.81                                      | 0.84 | 0.83 | 0.81 | 0.84 | 0.44        |
| Fish, servings/week                       | 1.1                                       | 1.5  | 1.9  | 2.1  | 2.8  | <0.001      |
| EPA and DHA, mg/week                      | 131                                       | 172  | 220  | 239  | 297  | <0.001      |
| Total energy, kcal/day                    | 1940                                      | 1900 | 1852 | 1803 | 1738 | <0.001      |
| Total fat, %E                             | 35.1                                      | 34.9 | 33.5 | 33.5 | 32.5 | <0.001      |
| Saturated fat, %E                         | 12.7                                      | 12.7 | 12.0 | 11.8 | 11.3 | <0.001      |
| Monounsaturated fat, %E                   | 13.3                                      | 13.1 | 12.6 | 12.5 | 12.0 | <0.001      |
| Polyunsaturated fat, %E                   | 6.1                                       | 6.2  | 6.1  | 6.3  | 6.3  | 0.01        |
| Trans fat, %E                             | 1.9                                       | 1.8  | 1.7  | 1.6  | 1.6  | <0.001      |
| Protein, %E                               | 17.1                                      | 17.8 | 18.3 | 18.3 | 18.7 | <0.001      |
| Dietary cholesterol, mg/day               | 323                                       | 326  | 312  | 310  | 292  | <0.001      |
| Whole grains, g/day                       | 17.7                                      | 16.7 | 18.0 | 19.0 | 16.9 | 0.73        |

Values are mean (continuous characteristics) or percent (categorical characteristics).



**Supplementary Table 2.** Relative Risk of Cardiovascular Diseases According to Deciles of Toenail Mercury in Two Prospective US Cohorts of Men and Women.

| <b>Sex-Specific Deciles of Toenail Mercury – Men and Women Combined</b> |             |              |              |              |                     |              |              |              |              |              |                    |
|-------------------------------------------------------------------------|-------------|--------------|--------------|--------------|---------------------|--------------|--------------|--------------|--------------|--------------|--------------------|
| <b>Deciles</b>                                                          | <b>D1</b>   | <b>D2</b>    | <b>D3</b>    | <b>D4</b>    | <b>D5</b>           | <b>D6</b>    | <b>D7</b>    | <b>D8</b>    | <b>D9</b>    | <b>D10</b>   | <b>P for Trend</b> |
| Mercury level, µg/g                                                     |             |              |              |              |                     |              |              |              |              |              |                    |
| Mean                                                                    | 0.07        | 0.11         | 0.15         | 0.19         | 0.23                | 0.27         | 0.35         | 0.42         | 0.59         | 1.62         |                    |
| Median                                                                  | 0.07        | 0.12         | 0.15         | 0.18         | 0.22                | 0.25         | 0.31         | 0.39         | 0.54         | 1.00         |                    |
| <hr/>                                                                   |             |              |              |              |                     |              |              |              |              |              |                    |
| <b><u>CHD</u></b>                                                       |             |              |              |              | Total cases = 2,363 |              |              |              |              |              |                    |
| No. of cases                                                            | 272         | 270          | 269          | 237          | 224                 | 222          | 228          | 222          | 210          | 209          |                    |
| Multivariable RR*                                                       | 1.00        | 0.99         | 1.04         | 0.94         | 0.84                | 0.91         | 0.84         | 0.89         | 0.80         | 0.90         | 0.32               |
| (95%CI)                                                                 | (reference) | (0.76, 1.29) | (0.79, 1.36) | (0.71, 1.23) | (0.64, 1.11)        | (0.69, 1.21) | (0.64, 1.10) | (0.67, 1.17) | (0.60, 1.06) | (0.68, 1.21) |                    |
| <b><u>Stroke</u></b>                                                    |             |              |              |              | Total cases = 1,064 |              |              |              |              |              |                    |
| No. of cases                                                            | 123         | 110          | 117          | 109          | 121                 | 88           | 96           | 113          | 96           | 91           |                    |
| Multivariable RR*                                                       | 1.00        | 0.80         | 0.83         | 0.87         | 1.09                | 0.65         | 0.80         | 0.96         | 0.75         | 0.71         | 0.23               |
| (95%CI)                                                                 | (reference) | (0.54, 1.19) | (0.55, 1.23) | (0.59, 1.30) | (0.73, 1.64)        | (0.43, 0.99) | (0.52, 1.22) | (0.65, 1.44) | (0.49, 1.14) | (0.46, 1.09) |                    |
| <b><u>Total CVD</u></b>                                                 |             |              |              |              | Total cases = 3,427 |              |              |              |              |              |                    |
| No. of cases                                                            | 395         | 380          | 386          | 346          | 345                 | 310          | 324          | 335          | 306          | 300          |                    |
| Multivariable RR*                                                       | 1.00        | 0.93         | 0.97         | 0.92         | 0.93                | 0.82         | 0.83         | 0.92         | 0.80         | 0.85         | 0.16               |
| (95%CI)                                                                 | (reference) | (0.75, 1.16) | (0.78, 1.21) | (0.74, 1.15) | (0.74, 1.16)        | (0.65, 1.03) | (0.66, 1.05) | (0.74, 1.16) | (0.63, 1.01) | (0.67, 1.08) |                    |

\*Based on conditional logistic regression with risk-set sampling, in which the odds ratio directly estimates the hazard ratio or relative risk (RR), with matching factors of age, sex, race, month of toenail return, and smoking status (never, former, current) and further adjusted for body mass index (kg/m<sup>2</sup>, quintiles), physical activity (METS/wk, quintiles), alcohol (drinks/wk, quintiles), diabetes (yes, no), hypertension (yes, no), elevated cholesterol (yes, no), and estimated dietary intake of EPA and DHA (mg/wk, quintiles).

**Supplementary Table 3.** Relative Risk of Cardiovascular Diseases According to Quintiles of Toenail Mercury Among 3,427 Cases and 3,427 Matched Controls in Two Prospective US Cohorts of Men and Women.

| Quintiles                                 | Women               |               |              |               |              | P for Trend | Men                 |               |               |               |              | P for Trend |
|-------------------------------------------|---------------------|---------------|--------------|---------------|--------------|-------------|---------------------|---------------|---------------|---------------|--------------|-------------|
|                                           | Q1                  | Q2            | Q3           | Q4            | Q5           |             | Q1                  | Q2            | Q3            | Q4            | Q5           |             |
| Range of mercury levels in controls, µg/g | 0.013 - 0.127       | 0.128 - 0.187 | 0.188-0.268  | 0.269 - 0.410 | 0.411 -14.78 |             | 0.005 - 0.139       | 0.140 - 0.241 | 0.242 - 0.375 | 0.376 - 0.609 | 0.610 - 5.00 |             |
| <b><u>CHD</u></b>                         | Total cases = 1,455 |               |              |               |              |             | Total cases = 908   |               |               |               |              |             |
| No. of cases                              | 357                 | 314           | 278          | 271           | 235          |             | 185                 | 192           | 168           | 179           | 184          |             |
| Multivariable RR*                         | 1.00                | 0.90          | 0.75         | 0.72          | 0.68         | 0.001       | 1.00                | 1.10          | 0.96          | 0.98          | 0.98         | 0.64        |
| (95% CI)                                  | (reference)         | (0.72, 1.12)  | (0.59, 0.95) | (0.57, 0.91)  | (0.53, 0.86) |             | (reference)         | (0.82, 1.48)  | (0.71, 1.28)  | (0.74, 1.30)  | (0.73, 1.31) |             |
| Multivariable RR†                         | 1.00                | 0.94          | 0.81         | 0.76          | 0.72         | 0.01        | 1.00                | 1.12          | 1.02          | 1.06          | 1.08         | 0.87        |
| (95% CI)                                  | (reference)         | (0.74, 1.19)  | (0.63, 1.05) | (0.59, 0.98)  | (0.55, 0.94) |             | (reference)         | (0.81, 1.54)  | (0.74, 1.42)  | (0.77, 1.47)  | (0.77, 1.51) |             |
| <b><u>Stroke</u></b>                      | Total cases = 761   |               |              |               |              |             | Total cases = 303   |               |               |               |              |             |
| No. of cases                              | 177                 | 152           | 154          | 146           | 132          |             | 56                  | 74            | 55            | 63            | 55           |             |
| Multivariable RR*                         | 1.00                | 0.85          | 0.92         | 0.92          | 0.69         | 0.03        | 1.00                | 1.11          | 0.82          | 1.03          | 1.13         | 0.73        |
| (95% CI)                                  | (reference)         | (0.63, 1.16)  | (0.67, 1.28) | (0.66, 1.27)  | (0.50, 0.95) |             | (reference)         | (0.66, 1.87)  | (0.48, 1.39)  | (0.63, 1.69)  | (0.64, 1.99) |             |
| Multivariable RR†                         | 1.00                | 0.91          | 1.01         | 1.00          | 0.74         | 0.09        | 1.00                | 1.14          | 0.86          | 1.03          | 1.28         | 0.55        |
| (95% CI)                                  | (reference)         | (0.65, 1.27)  | (0.71, 1.44) | (0.70, 1.43)  | (0.52, 1.06) |             | (reference)         | (0.63, 2.05)  | (0.48, 1.56)  | (0.59, 1.80)  | (0.65, 2.54) |             |
| <b><u>Total CVD</u></b>                   | Total cases = 2,216 |               |              |               |              |             | Total cases = 1,211 |               |               |               |              |             |
| No. of cases                              | 534                 | 466           | 432          | 417           | 367          |             | 241                 | 266           | 223           | 242           | 239          |             |
| Multivariable RR*                         | 1.00                | 0.88          | 0.80         | 0.78          | 0.68         | <0.001      | 1.00                | 1.11          | 0.92          | 1.00          | 1.01         | 0.84        |
| (95% CI)                                  | (reference)         | (0.74, 1.06)  | (0.67, 0.97) | (0.65, 0.94)  | (0.56, 0.82) |             | (reference)         | (0.86, 1.43)  | (0.71, 1.19)  | (0.79, 1.28)  | (0.78, 1.31) |             |
| Multivariable RR†                         | 1.00                | 0.93          | 0.88         | 0.84          | 0.74         | 0.005       | 1.00                | 1.12          | 0.94          | 1.04          | 1.10         | 0.65        |
| (95% CI)                                  | (reference)         | (0.77, 1.12)  | (0.72, 1.08) | (0.69, 1.03)  | (0.60, 0.91) |             | (reference)         | (0.85, 1.47)  | (0.71, 1.25)  | (0.79, 1.37)  | (0.82, 1.48) |             |

\*Based on conditional logistic regression with risk-set sampling, in which the odds ratio directly estimates the hazard ratio or relative risk (RR), with matching factors of age, sex, race, month of toenail return, and smoking status (never, former, current).

†Further adjusted for body mass index (kg/m<sup>2</sup>, quintiles), physical activity (METS/wk, quintiles), alcohol (drinks/wk, quintiles), diabetes (yes, no), hypertension (yes, no), elevated cholesterol (yes, no), and estimated dietary intake of EPA and DHA (mg/wk, quintiles).

**Supplementary Table 4.** Relative Risk of Cardiovascular Diseases According to Quintiles of Toenail Mercury, Restricted to Events within 0-5, 5-10, 10-15, and  $\geq 15$  Years of Toenail Sampling.

| <b>Sex-Specific Quintiles of Toenail Mercury – Men and Women Combined</b> |             |              |              |              |              |                    |
|---------------------------------------------------------------------------|-------------|--------------|--------------|--------------|--------------|--------------------|
| <b>Quintiles</b>                                                          | <b>Q1</b>   | <b>Q2</b>    | <b>Q3</b>    | <b>Q4</b>    | <b>Q5</b>    | <b>P for Trend</b> |
| <b>During 0 – 5 years of follow-up</b>                                    |             |              |              |              |              |                    |
| No. of cases (n = 637)                                                    | 140         | 136          | 117          | 128          | 116          |                    |
| Multivariable RR*                                                         | 1.00        | 1.15         | 0.94         | 1.16         | 1.00         | 0.90               |
| (95% CI)                                                                  | (reference) | (0.79, 1.69) | (0.64, 1.37) | (0.78, 1.73) | (0.67, 1.51) |                    |
| <b>During 5 – 10 years of follow-up</b>                                   |             |              |              |              |              |                    |
| No. of cases (n = 798)                                                    | 187         | 163          | 153          | 157          | 138          |                    |
| Multivariable RR*                                                         | 1.00        | 0.77         | 0.93         | 0.87         | 0.72         | 0.17               |
| (95% CI)                                                                  | (reference) | (0.54, 1.08) | (0.64, 1.34) | (0.61, 1.24) | (0.49, 1.05) |                    |
| <b>During 10 – 15 years of follow-up</b>                                  |             |              |              |              |              |                    |
| No. of cases (n = 1056)                                                   | 246         | 231          | 199          | 189          | 191          |                    |
| Multivariable RR*                                                         | 1.00        | 0.98         | 0.87         | 0.81         | 0.84         | 0.25               |
| (95% CI)                                                                  | (reference) | (0.74, 1.30) | (0.64, 1.18) | (0.60, 1.08) | (0.61, 1.16) |                    |
| <b>During 15+ years of follow-up</b>                                      |             |              |              |              |              |                    |
| No. of cases (n = 936)                                                    | 202         | 202          | 186          | 185          | 161          |                    |
| Multivariable RR*                                                         | 1.00        | 1.08         | 0.92         | 0.92         | 0.91         | 0.43               |
| (95% CI)                                                                  | (reference) | (0.80, 1.45) | (0.67, 1.26) | (0.67, 1.27) | (0.65, 1.26) |                    |

\*Based on conditional logistic regression with risk-set sampling, in which the odds ratio directly estimates the hazard ratio or relative risk (RR), with matching factors of age, sex, race, month of toenail return, and smoking status (never, former, current), and further adjusted for body mass index ( $\text{kg}/\text{m}^2$ , quintiles), physical activity (METS/wk, quintiles), alcohol (drinks/wk, quintiles), diabetes (yes, no), hypertension (yes, no), elevated cholesterol (yes, no), and estimated dietary intake of EPA and DHA (mg/wk, quintiles).

**Supplementary Table 5.** Relative Risk of Coronary Heart Disease According to Quintiles of Toenail Mercury Among Individuals in Different Strata of Fish Consumption in Two Prospective US Cohorts of Men and Women.

| <b>Sex-Specific Quintiles of Toenail Mercury – Men and Women Combined*</b> |                     |                      |                      |                      |                      |                    |
|----------------------------------------------------------------------------|---------------------|----------------------|----------------------|----------------------|----------------------|--------------------|
| <b>Quintiles</b>                                                           | <b>Q1</b>           | <b>Q2</b>            | <b>Q3</b>            | <b>Q4</b>            | <b>Q5</b>            | <b>P for Trend</b> |
| <b>Stratified by Total Fish Consumption †</b>                              |                     |                      |                      |                      |                      |                    |
| <1 servings/week (1023 cases)                                              | 1.00<br>(reference) | 0.94<br>(0.74, 1.19) | 0.90<br>(0.69, 1.17) | 0.80<br>(0.60, 1.06) | 0.90<br>(0.65, 1.25) | 0.33               |
| 1 to <2 servings/week (705 cases)                                          | 1.00<br>(reference) | 1.02<br>(0.71, 1.45) | 0.95<br>(0.66, 1.37) | 0.80<br>(0.56, 1.15) | 0.79<br>(0.54, 1.16) | 0.10               |
| 2+ servings/week (635 cases)                                               | 1.00<br>(reference) | 0.90<br>(0.53, 1.51) | 0.61<br>(0.37, 1.00) | 0.87<br>(0.54, 1.39) | 0.78<br>(0.49, 1.25) | 0.80               |
| <b>Stratified by Tuna or Dark-Meat Fish Consumption †</b>                  |                     |                      |                      |                      |                      |                    |
| <1 servings/week (1720 cases)                                              | 1.00<br>(reference) | 1.00<br>(0.83, 1.23) | 0.90<br>(0.73, 1.12) | 0.86<br>(0.69, 1.07) | 0.94<br>(0.74, 1.19) | 0.42               |
| 1 to <2 servings/week (326 cases)                                          | 1.00<br>(reference) | 0.68<br>(0.35, 1.33) | 0.67<br>(0.35, 1.28) | 0.89<br>(0.47, 1.69) | 0.66<br>(0.35, 1.22) | 0.50               |
| 2+ servings/week (317 cases)                                               | 1.00<br>(reference) | 0.73<br>(0.34, 1.56) | 0.53<br>(0.26, 1.08) | 0.54<br>(0.27, 1.08) | 0.52<br>(0.26, 1.01) | 0.18               |
| <b>Stratified by Other Fish Consumption †</b>                              |                     |                      |                      |                      |                      |                    |
| <0.5 servings/week (1447 cases)                                            | 1.00<br>(reference) | 0.98<br>(0.79, 1.21) | 0.86<br>(0.68, 1.09) | 0.80<br>(0.63, 1.02) | 0.88<br>(0.68, 1.15) | 0.23               |
| 0.5 to <1 servings/week (657 cases)                                        | 1.00<br>(reference) | 1.01<br>(0.68, 1.50) | 0.91<br>(0.62, 1.35) | 0.89<br>(0.60, 1.32) | 0.76<br>(0.51, 1.13) | 0.08               |
| 1+ servings/week (259 cases)                                               | 1.00<br>(reference) | 0.82<br>(0.35, 1.90) | 0.79<br>(0.36, 1.73) | 1.01<br>(0.48, 2.13) | 1.13<br>(0.54, 2.38) | 0.25               |

\*Quintile cutpoints are based on the overall control population (see Supplementary Table 1). Thus, in every stratum of fish consumption, higher quintiles reflect individuals who have similarly high mercury exposure. In the setting of low fish consumption (e.g., <1/week), this would be consistent with more exclusive consumption of relatively mercury-contaminated fish (i.e., similar methylmercury exposure coming from fewer fish meals, indicating a greater proportion of more highly contaminated fish in the diet).

†Total fish consumption reflects the sum of tuna or dark-meat fish consumption and other fish consumption. Strata were set at logical cutpoints that provided reasonable numbers of cases per stratum.

Based on unconditional logistic regression as appropriate for stratified subgroup analyses. Values are odds ratios (95% CI), adjusted for age, sex, race, month of toenail return, smoking status (never, former, current), body mass index (kg/m<sup>2</sup>, quintiles), physical activity (METS/wk, quintiles), alcohol (drinks/wk, quintiles), diabetes (yes, no), hypertension (yes, no), elevated cholesterol (yes, no), and estimated dietary intake of EPA and DHA (mg/wk, quintiles).

**Supplementary Table 6.** Relative Risk of Stroke According to Quintiles of Toenail Mercury Among Individuals in Different Strata of Fish Consumption in Two Prospective US Cohorts of Men and Women.

| Quintiles                                                 | Sex-Specific Quintiles of Toenail Mercury – Men and Women Combined* |                      |                      |                      |                      | P for Trend |
|-----------------------------------------------------------|---------------------------------------------------------------------|----------------------|----------------------|----------------------|----------------------|-------------|
|                                                           | Q1                                                                  | Q2                   | Q3                   | Q4                   | Q5                   |             |
| <b>Stratified by Total Fish Consumption †</b>             |                                                                     |                      |                      |                      |                      |             |
| <1 servings/week (477 cases)                              | 1.00<br>(reference)                                                 | 1.12<br>(0.77, 1.62) | 0.95<br>(0.63, 1.42) | 0.79<br>(0.51, 1.21) | 0.91<br>(0.57, 1.44) | 0.38        |
| ≥1 servings/week (587 cases)                              | 1.00<br>(reference)                                                 | 0.80<br>(0.53, 1.22) | 0.99<br>(0.66, 1.50) | 1.20<br>(0.80, 1.80) | 0.82<br>(0.55, 1.23) | 0.48        |
| <b>Stratified by Tuna or Dark-Meat Fish Consumption †</b> |                                                                     |                      |                      |                      |                      |             |
| <0.5 servings/week (492 cases)                            | 1.00<br>(reference)                                                 | 0.95<br>(0.65, 1.37) | 0.95<br>(0.64, 1.42) | 0.81<br>(0.53, 1.23) | 0.83<br>(0.53, 1.28) | 0.32        |
| ≥0.5 servings/week (572 cases)                            | 1.00<br>(reference)                                                 | 0.97<br>(0.64, 1.46) | 0.96<br>(0.63, 1.44) | 1.16<br>(0.77, 1.75) | 0.81<br>(0.53, 1.23) | 0.27        |
| <b>Stratified by Other Fish Consumption †</b>             |                                                                     |                      |                      |                      |                      |             |
| <0.5 servings/week (674 cases)                            | 1.00<br>(reference)                                                 | 1.03<br>(0.74, 1.43) | 1.05<br>(0.75, 1.48) | 1.04<br>(0.73, 1.49) | 0.82<br>(0.55, 1.20) | 0.27        |
| ≥0.5 servings/week (390 cases)                            | 1.00<br>(reference)                                                 | 0.87<br>(0.52, 1.46) | 0.90<br>(0.54, 1.51) | 1.05<br>(0.63, 1.76) | 0.87<br>(0.53, 1.43) | 0.76        |

\*Quintile cutpoints are based on the overall control population (see Supplementary Table 1). Thus, in every stratum of fish consumption, higher quintiles reflect individuals who have similarly high mercury exposure. In the setting of low fish consumption (e.g., <1/week), this would be consistent with more exclusive consumption of relatively mercury-contaminated fish (i.e., similar methylmercury exposure coming from fewer fish meals, indicating a greater proportion of more highly contaminated fish in the diet).

†Total fish consumption reflects the sum of tuna or dark-meat fish consumption and other fish consumption. Strata were set at logical cutpoints that provided reasonable numbers of cases per stratum.

Based on unconditional logistic regression as appropriate for stratified subgroup analyses. Values are odds ratios (95% CI), adjusted for age, sex, race, month of toenail return, smoking status (never, former, current), body mass index (kg/m<sup>2</sup>, quintiles), physical activity (METS/wk, quintiles), alcohol (drinks/wk, quintiles), diabetes (yes, no), hypertension (yes, no), elevated cholesterol (yes, no), and estimated dietary intake of EPA and DHA (mg/wk, quintiles).
